# Supplementary material for: Defect-rich carbon-coated nickel–cobalt alloy nanoparticles enhanced the OER catalytic activity through surface reconstruction
Source: Royal Society of Chemistry journal article supplement (doi:10.1039/d3nj02425c), 2023-01-01
Supplement: d3nj02425c1.pdf [file d3nj02425c1.pdf]

## Supporting Information

### Defect-rich carbon-coated nickel-cobalt alloy nanoparticles enhanced OER catalytic activity through surface reconstruction

Jiajia Liu<sup>1</sup>, Xiao Wang<sup>2</sup>, Yulin Min<sup>1,3</sup>, Qiaoxia Li<sup>1,3\*</sup>, and Qunjie Xu<sup>1,3\*</sup>

<sup>1</sup> Shanghai Key Laboratory of Materials Protection and Advanced Materials Electric Power, Shanghai University of Electric Power, Shanghai 200090, P. R. China

<sup>2</sup> School of Environmental and Chemical Engineering, Shanghai University, Shanghai 200444, China

<sup>3</sup> Shanghai Institute of Pollution Control and Ecological Security, Shanghai 200092, P. R. China

\* Corresponding authors

E-mail : [liqiaoxia@shiep.edu.cn](mailto:liqiaoxia@shiep.edu.cn); [xuqunjie@shiep.edu.cn](mailto:xuqunjie@shiep.edu.cn)

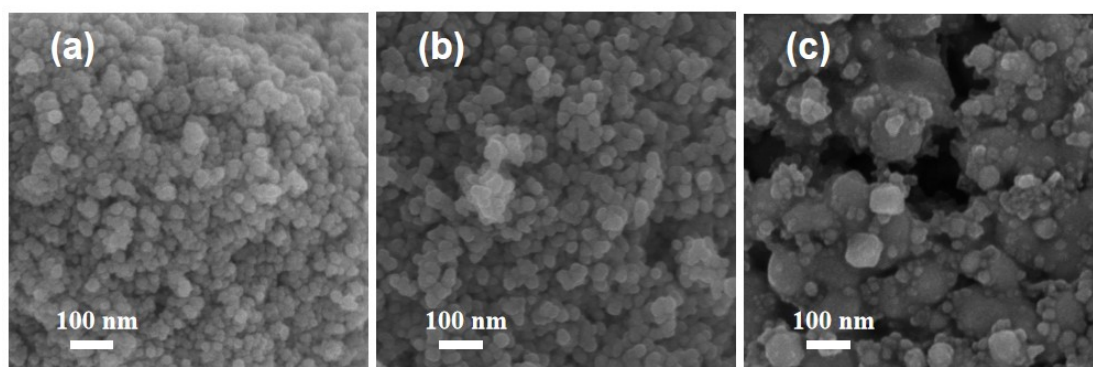

Fig. S1. SEM images of the Ni<sub>x</sub>Co<sub>y</sub>(CA). (a) Ni<sub>0.8</sub>Co<sub>0.2</sub>(CA). (b) Ni<sub>0.6</sub>Co<sub>0.4</sub>(CA). (c) Ni<sub>0.4</sub>Co<sub>0.6</sub>(CA).

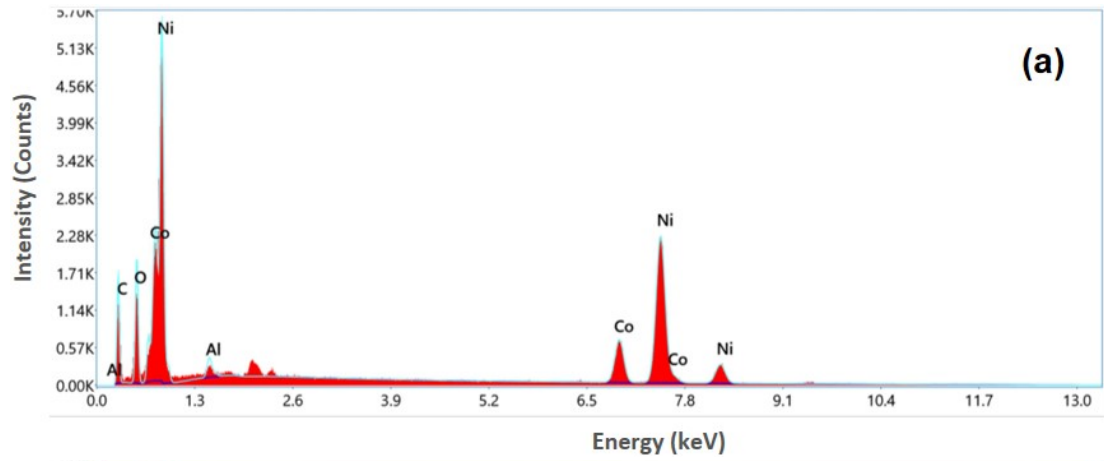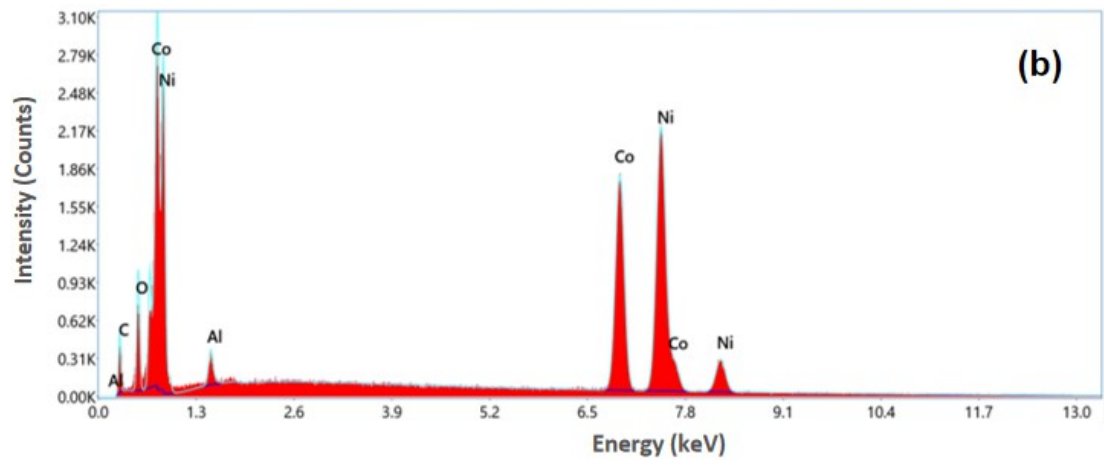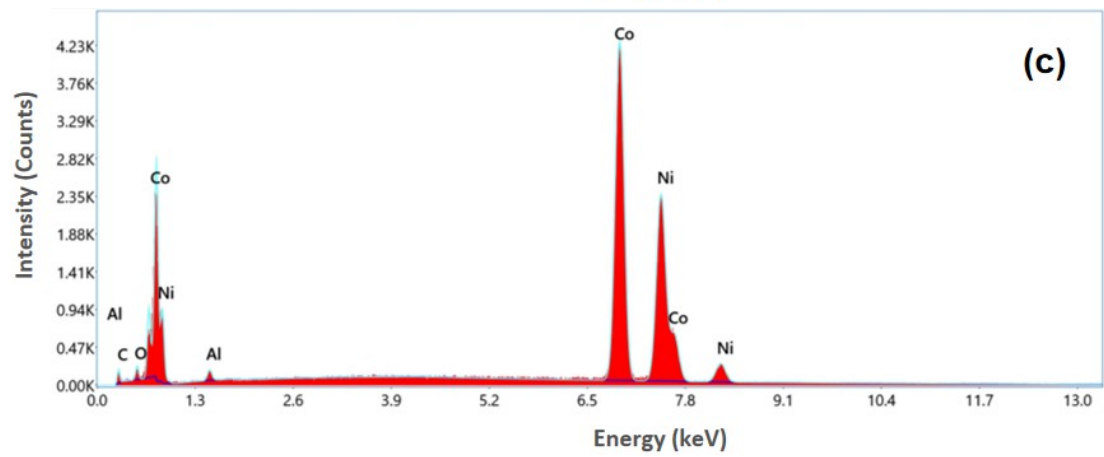

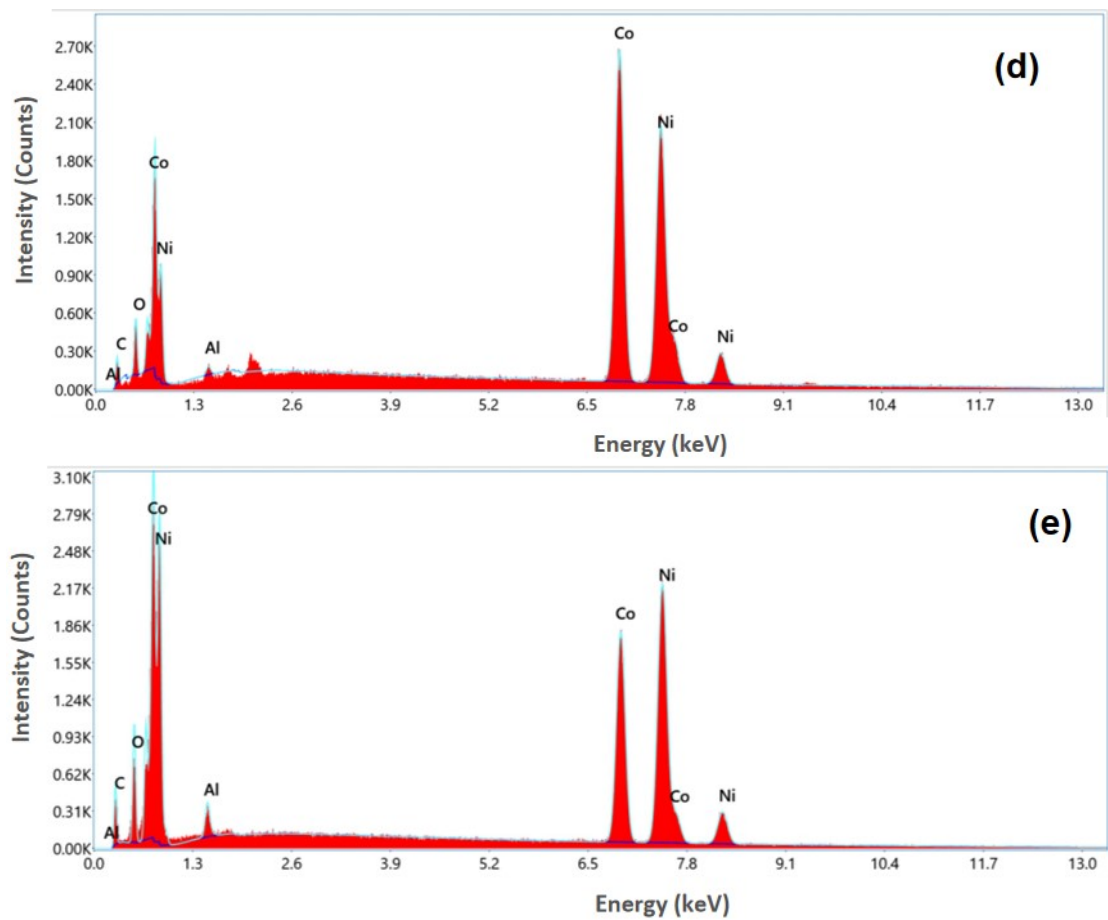

Fig. S2. EDS spectrum of (a)  $\text{Ni}_{0.8}\text{Co}_{0.2}(\text{CA})$ , (b)  $\text{Ni}_{0.7}\text{Co}_{0.3}(\text{CA})$ , (c)  $\text{Ni}_{0.6}\text{Co}_{0.4}(\text{CA})$ , (d)  $\text{Ni}_{0.5}\text{Co}_{0.5}(\text{CA})$ , and (e)  $\text{Ni}_{0.4}\text{Co}_{0.6}(\text{CA})$ .

Table S1. The energy dispersion spectrum(EDS) element analysis results of the Ni/Co atomic ratios in Ni<sub>x</sub>Co<sub>y</sub>(CA).

| Catalyst                                 | Element | Atomic (%) | Weight (%) | Ni/Co (Atom) |
|------------------------------------------|---------|------------|------------|--------------|
| Ni <sub>0.8</sub> Co <sub>0.2</sub> (CA) | C       | 73.81      | 49.89      | 0.8 : 0.190  |
|                                          | O       | 14.77      | 13.30      |              |
|                                          | Al      | 0.54       | 0.81       |              |
|                                          | Ni      | 8.80       | 29.07      |              |
|                                          | Co      | 2.09       | 6.92       |              |
| Ni <sub>0.7</sub> Co <sub>0.3</sub> (CA) | C       | 61.64      | 30.63      | 0.7 : 0.308  |
|                                          | O       | 12.99      | 8.60       |              |
|                                          | Al      | 0.67       | 0.75       |              |
|                                          | Ni      | 17.14      | 41.62      |              |
|                                          | Co      | 7.55       | 18.40      |              |
| Ni <sub>0.6</sub> Co <sub>0.4</sub> (CA) | C       | 60.32      | 9.48       | 0.6 : 0.408  |
|                                          | O       | 10.88      | 0.70       |              |
|                                          | Al      | 1.28       | 0.62       |              |
|                                          | Ni      | 16.37      | 34.83      |              |
|                                          | Co      | 11.15      | 54.37      |              |
| Ni <sub>0.5</sub> Co <sub>0.5</sub> (CA) | C       | 43.51      | 14.62      | 0.5 : 0.543  |
|                                          | O       | 5.92       | 2.65       |              |
|                                          | Al      | 0.55       | 0.42       |              |
|                                          | Ni      | 23.90      | 39.25      |              |
|                                          | Co      | 26.12      | 43.06      |              |
| Ni <sub>0.4</sub> Co <sub>0.6</sub> (CA) | C       | 33.28      | 28.40      | 0.4 : 0.625  |
|                                          | O       | 1.83       | 6.83       |              |
|                                          | Al      | 0.97       | 1.36       |              |
|                                          | Ni      | 25.02      | 37.66      |              |
|                                          | Co      | 38.90      | 25.76      |              |

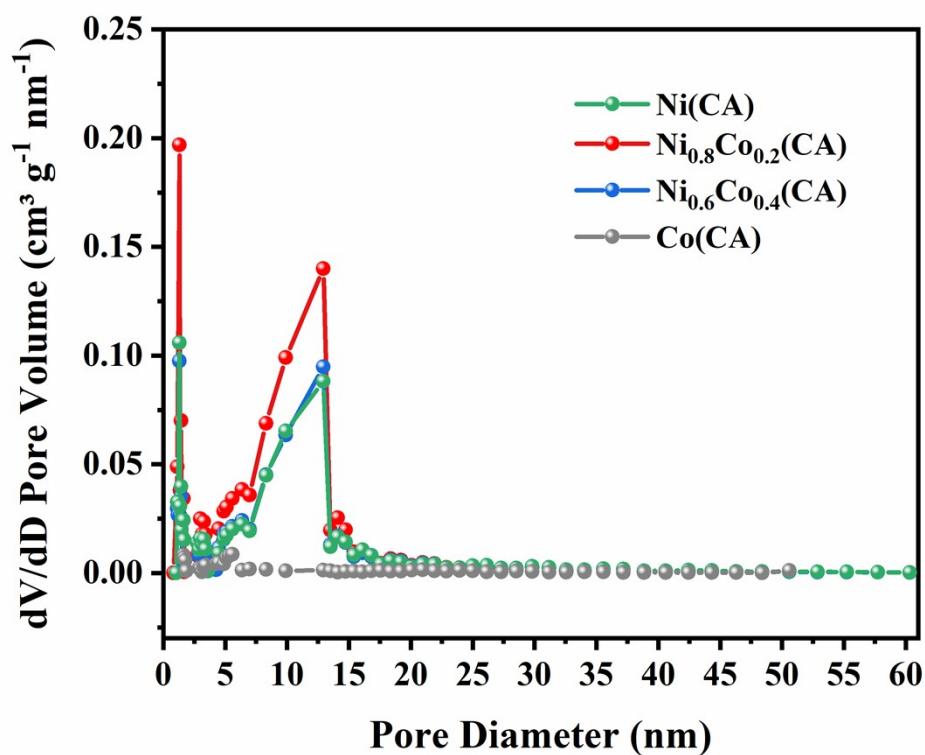

Fig. S3. The pore size distribution curves of Ni(CA), Ni<sub>0.8</sub>Co<sub>0.2</sub>(CA), Ni<sub>0.6</sub>Co<sub>0.4</sub>(CA) and Co(CA).

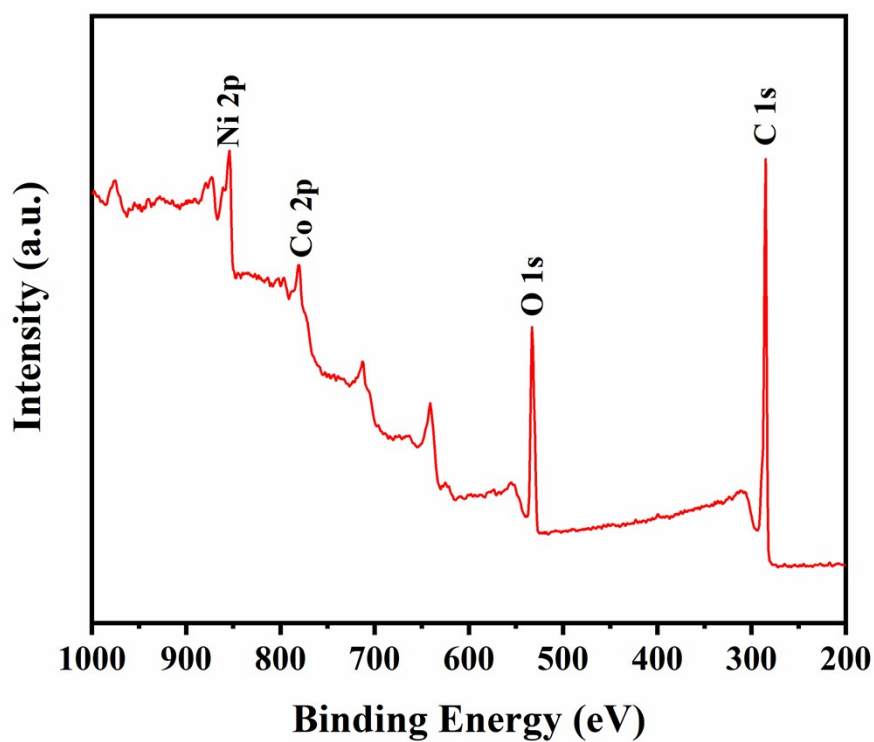

Fig. S4. XPS survey spectrum for Ni<sub>0.8</sub>Co<sub>0.2</sub>(CA).

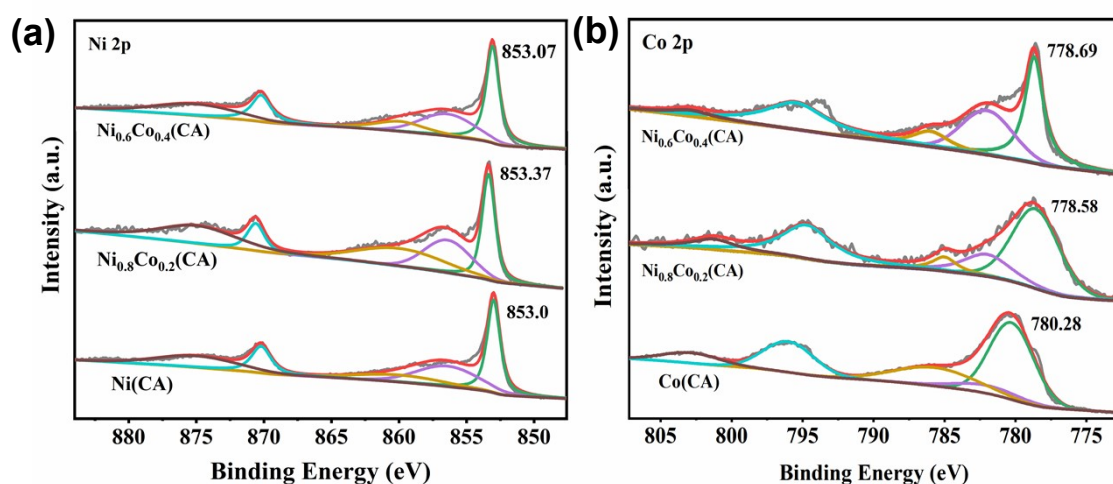

Fig. S5. (a) High-resolution XPS spectrum of Ni 2p for Ni(CA), Ni<sub>0.8</sub>Co<sub>0.2</sub>(CA), and Ni<sub>0.6</sub>Co<sub>0.4</sub>(CA). (b) XPS spectrum of Co 2p for Ni<sub>0.8</sub>Co<sub>0.2</sub>(CA), Ni<sub>0.6</sub>Co<sub>0.4</sub>(CA) and Co(CA).

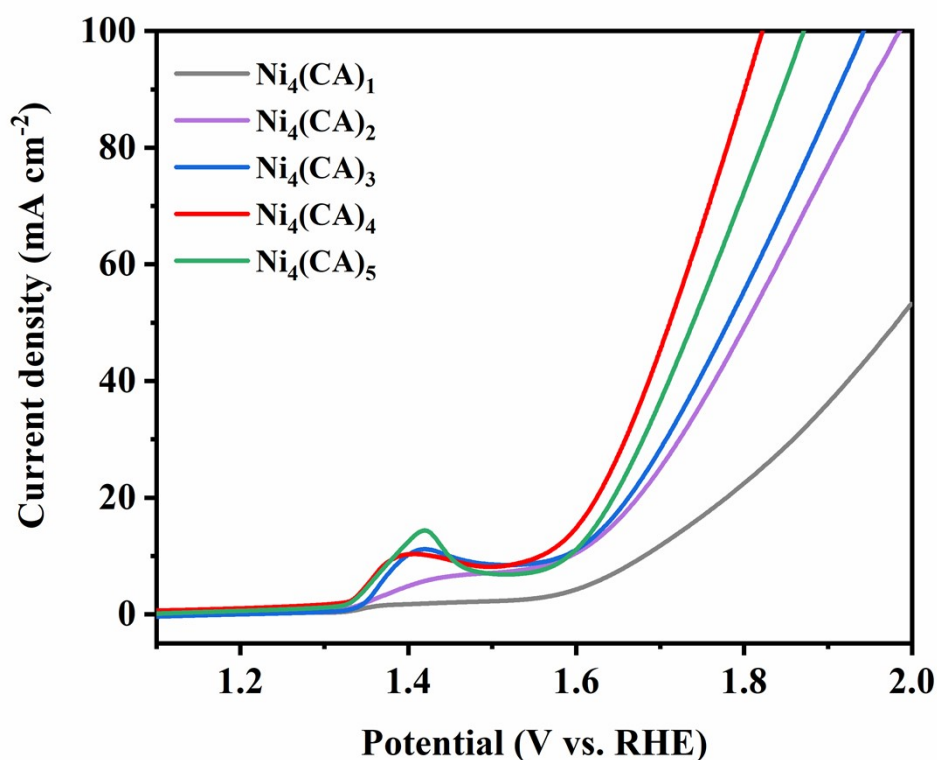

Fig. S6. LSV curves of different metal to citric acid molar ratio (M/C) at 1 M KOH.

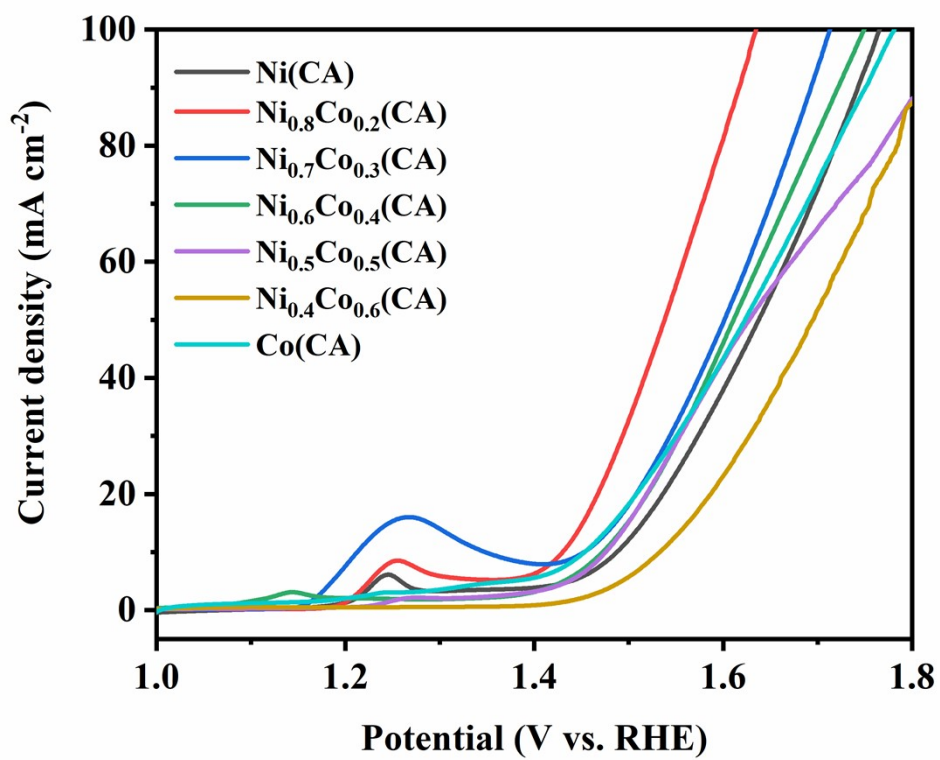

Fig. S7. LSV curves of different Ni to Co molar ratio (Ni/Co) at 1 M KOH.

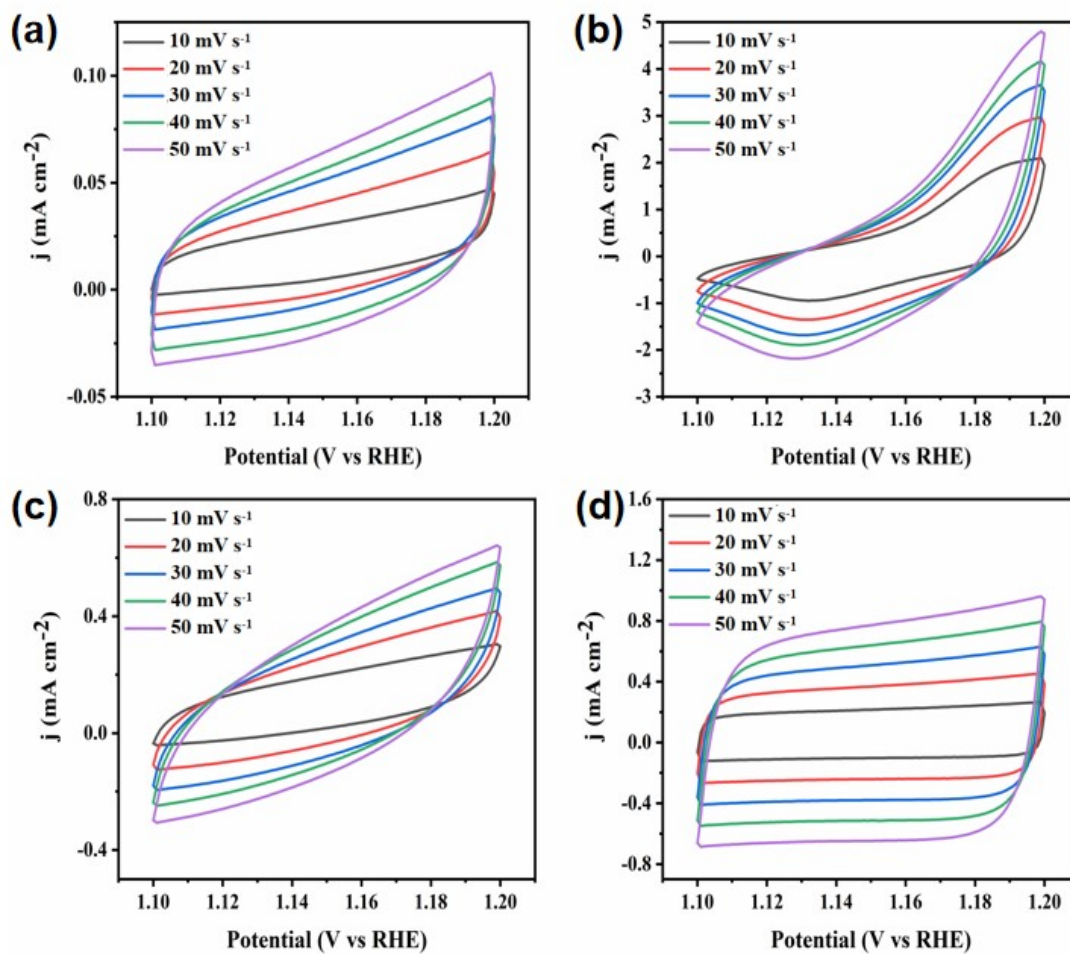

Fig. S8. CV curves acquired at the different scanning rates of 10~50  $\text{mV s}^{-1}$  from (a)  $\text{Ni(CA)}$ , (b)  $\text{Ni}_{0.8}\text{Co}_{0.2}\text{(CA)}$ , (c)  $\text{Ni}_{0.6}\text{Co}_{0.4}\text{(CA)}$ , and (d)  $\text{Co(CA)}$ .



Table S2. Comparison of the activity for the Ni<sub>0.8</sub>Co<sub>0.2</sub>(CA) catalyst with recently reported electrocatalysts

| Catalyst                                 | $\eta_{10}$ (vs.RHE) | Tafel slope | Electrolyte | References |
|------------------------------------------|----------------------|-------------|-------------|------------|
| Ir-NiCo LDH                              | 220 mV               | 33.2 mV/dec | 1 M KOH     | [1]        |
| CoNi-NCNT                                | 390 mV               | 67 mV/dec   | 1 M KOH     | [2]        |
| CoOOH HNSs                               | 305 mV               | -           | 1 M KOH     | [3]        |
| Co <sub>x</sub> Ni <sub>y</sub> @NC      | 300 mV               | 67.4 mV/dec | 1 M KOH     | [4]        |
| CoN <sub>2</sub> O <sub>2</sub>          | 300 mV               | -           | 1 M KOH     | [5]        |
| Pt/NiO/Ni/CNTs                           | 350 mV               | 33 mV/dec   | 0.1 M KOH   | [6]        |
| NiFe-MOF                                 | 215 mV               | 49.1 mV/dec | 1 M KOH     | [7]        |
| Ni-BDC/Ni(OH) <sub>2</sub>               | 320 mV               | 41 mV/dec   | 1 M KOH     | [8]        |
| Co <sub>3</sub> O <sub>4</sub> /Co@NCs   | 320 mV               | 51.7 mV/dec | 0.1 M KOH   | [9]        |
| Ni/NC-600                                | 336 mV               | 22 mV/dec   | 1 M KOH     | [10]       |
| RuO <sub>2</sub>                         | 300 mV               | 165 mV/dec  | 1 M KOH     | This work  |
| Ni <sub>0.8</sub> Co <sub>0.2</sub> (CA) | 200 mV               | 87 mV/dec   | 1 M KOH     | This work  |

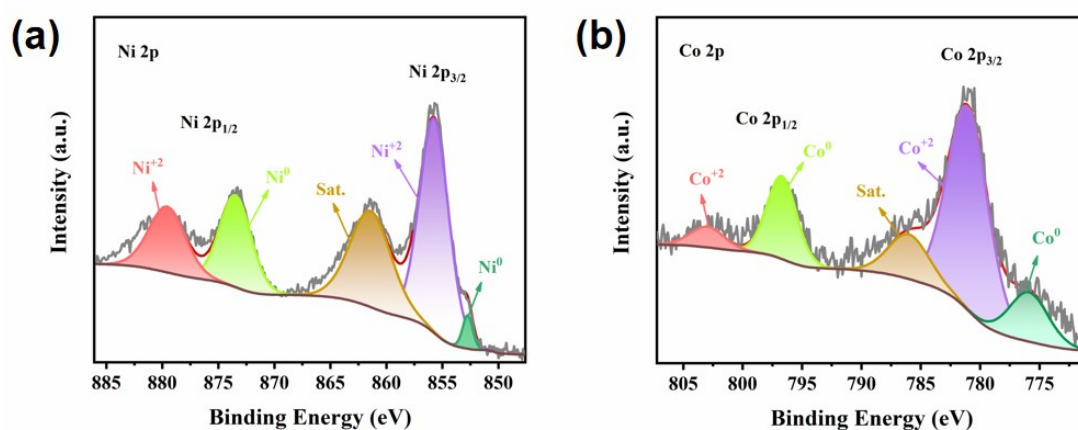

Fig. S9 XPS spectra. High-resolution spectra of (a) Ni 2p and (b) Co 2p for Ni<sub>0.8</sub>Co<sub>0.2</sub>(CA) after 10 h i-t test.

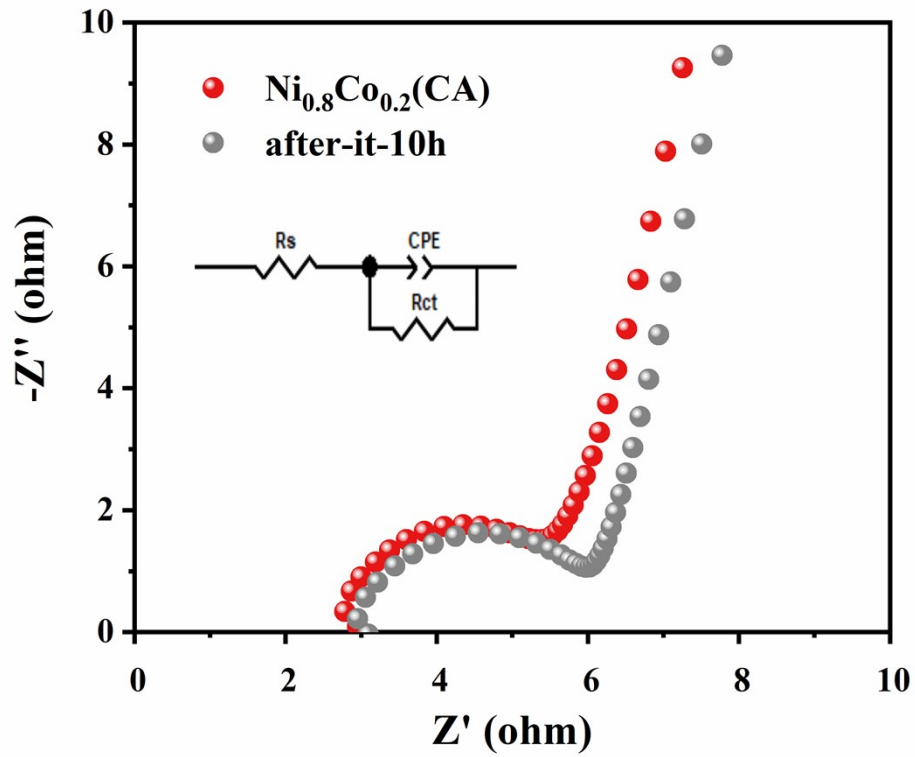

Fig. S10 EIS Nyquist plots of  $\text{Ni}_{0.8}\text{Co}_{0.2}(\text{CA})$  before and after the reaction (inset: the equivalent circuit.  $R_s$  and  $R_{ct}$  correspond to the electrolyte and charge transfer resistance, respectively).

## References

- [1] R. Fan, Q. Mu, Z. Wei, Y. Peng, and M. Shen, *Journal of Materials Chemistry A*, 2020, **8**, 9871-9881.
- [2] M. Qiao, Y. Wang, T. Wågberg, X. Mamat, X. Hu, G. Zou, and G. Hu, *J Energy Chem*, 2020, **47**, 146-154.
- [3] Q.-L. Hong, Q.-G. Zhai, X.-L. Liang, Y. Yang, F.-M. Li, Y.-C. Jiang, M.-C. Hu, S.-N. Li, and Y. Chen, *J Mater Chem A*, 2021, **9**, 3297-3302.
- [4] J. Ran, X. Guo, P. Liu, S. Peng, X. Gao, and D. Gao, *Nanotechnology*, 2019, **30**, 435701.
- [5] X. Wei, S. Cao, H. Xu, C. Jiang, Z. Wang, Y. Ouyang, X. Lu, F. Dai, and D. Sun, *ACS Materials Letters*, 2022, **4**, 1991-1998.
- [6] Y. Bian, H. Wang, Z. Gao, J. Hu, D. Liu, and L. Dai, *Nanoscale*, 2020, **12**, 14615-14625.
- [7] J. Zhou, Z. Han, X. Wang, H. Gai, Z. Chen, T. Guo, X. Hou, L. Xu, X. Hu, M. Huang, S.V. Levchenko, and H. Jiang, *Adv Funct Mater*, 2021, **31**, 2102066.
- [8] D. Zhu, J. Liu, L. Wang, Y. Du, Y. Zheng, K. Davey, and S.-Z. Qiao, *Nanoscale*, 2019, **11**, 3599-3605.
- [9] N.-F. Yu, C. Wu, W. Huang, Y.-H. Chen, D.-Q. Ruan, K.-L. Bao, H. Chen, Y. Zhang, Y. Zhu, Q.-H. Huang, W.-H. Lai, Y.-X. Wang, H.-G. Liao, S.-G. Sun, Y.-P. Wu, and J. Wang, *Nano Energy*, 2020, **77**, 105200.
- [10] Y. Zheng, G. Zhang, P. Zhang, S. Chu, D. Wu, C. Sun, B. Qian, S. Chen, S. Tao, and L. Song, *Chem Eng J*, 2022, **429**, 132122.
